# Supplementary material for: Brain angiotensin II in dopaminergic imbalance-derived pathologies: neuroinflammation and vascular responses
Source: PubMed Central journal article supplement — Neural Regen Res. 2020 Sep 22;16(3):504–5. doi: 10.4103/1673-5374.293144 (PMC7996039; doi:10.4103/1673-5374.293144), 2020-09-22
Supplement: NRR-16-504_Suppl1.pdf [file NRR-16-504_Suppl1.pdf]

## OPEN PEER REVIEW REPORT 1

**Name of journal:** Neural Regeneration Research

**Manuscript NO:** NRR-D-20-00036

**Title:** Brain Angiotensin II in dopaminergic-imbalance pathologies: neuroinflammation and vascular responses

**Reviewer's Name:** Komal Kalani

**Reviewer's country:** USA

**Date sent for review:** 2020-4-7

### COMMENTS TO AUTHORS

The article "Brain Angiotensin II in dopaminergic-imbalance pathologies: neuroinflammation and vascular responses describes the role of brain angiotension in dopaminergic-imbalance pathology. The review article is too short that it is unable to cover the important literature properly. The figure given is not worth as it doesn't represent anything; however, any mechanistic schematic figure would justify the article. Also, a table of drugs and related work summary would concise the review.
